# Supplementary material for: Integrated Nutrient Management Significantly Improves Pomelo (Citrus grandis) Root Growth and Nutrients Uptake under Acidic Soil of Southern China
Source: MDPI journal article supplement (doi:10.3390/agronomy11061231), 2021-06-17
Supplement: s1 [file s1]

# Integrated Nutrient Management Significantly Improves Pomelo Root (*Citrus grandis*) Growth and Nutrients Uptake under Acidic Soil of Southern China

Xiaoman Huang<sup>1†</sup>, Muhammad Atif Muneer<sup>1†</sup>, Jian Li<sup>1</sup>, Wei Hou<sup>1</sup>, Changcheng Ma<sup>1</sup>, Jiabing Jiao<sup>1</sup>, Yuanyang Cai<sup>2</sup>, Xiaohui Chen<sup>1</sup>, Liangquan Wu<sup>1\*</sup>, Chaoyuan Zheng<sup>1\*</sup>

<sup>1</sup> College of Resources and Environment/International Magnesium Institute, Fujian Agriculture and Forestry University, Fuzhou 350002, China

<sup>2</sup> College of Plant Science, Jilin University, Changchun 130062, China

\* Correspondence: Liangquan Wu (L.W), liangquan01@163.com ; Chaoyuan Zheng (C.Z); zhengcy@cau.edu.cn

**Table S1.** Amount of fertilizer applied during different growth periods of pomelo tree (kg plant<sup>-1</sup>).

|       | Treatment | Urea | Diammonium phosphate | Potassium sulfate | Magnesium sulfate monohydrate | Lime | Mushroom residue |
|-------|-----------|------|----------------------|-------------------|-------------------------------|------|------------------|
| Feb.  | FFP       | 0.42 | 0.56                 | 0.46              | 0.00                          | 0.00 | 0.00             |
|       | O+L+M     | 0.09 | 0.00                 | 0.09              | 0.00                          | 0.00 | 0.00             |
|       | O+L+Mg    | 0.11 | 0.00                 | 0.10              | 0.04                          | 0.00 | 0.00             |
| April | FFP       | 0.64 | 0.84                 | 0.69              | 0.00                          | 0.00 | 0.00             |
|       | O+L+M     | 0.13 | 0.00                 | 0.13              | 0.00                          | 1.20 | 0.00             |
|       | O+L+Mg    | 0.17 | 0.00                 | 0.15              | 0.06                          | 1.20 | 0.00             |
| June  | FFP       | 0.42 | 0.56                 | 0.46              | 0.00                          | 0.00 | 0.00             |
|       | O+L+M     | 0.09 | 0.00                 | 0.09              | 0.00                          | 0.00 | 0.00             |
|       | O+L+Mg    | 0.11 | 0.00                 | 0.10              | 0.04                          | 0.00 | 0.00             |
| Dec.  | FFP       | 0.64 | 0.84                 | 0.69              | 0.00                          | 0.00 | 9.91             |
|       | O+L+M     | 0.13 | 0.00                 | 0.13              | 0.00                          | 1.20 | 2.57             |
|       | O+L+Mg    | 0.17 | 0.00                 | 0.15              | 0.06                          | 1.20 | 0.00             |

**Table S2.** Chemical composition of mushroom residue

| pH   | P<br>(g/kg) | K<br>(g/kg) | Ca<br>(g/kg) | Mg<br>(g/kg) | Mn<br>(g/kg) | Fe<br>(g/kg) | Cu<br>(g/kg) | Zn<br>(g/kg) | B<br>(g/kg) |
|------|-------------|-------------|--------------|--------------|--------------|--------------|--------------|--------------|-------------|
| 8.84 | 3.385       | 4.108       | 337.809      | 3.761        | 0.247        | 3.553        | 0.001        | 0.033        | 0.021       |

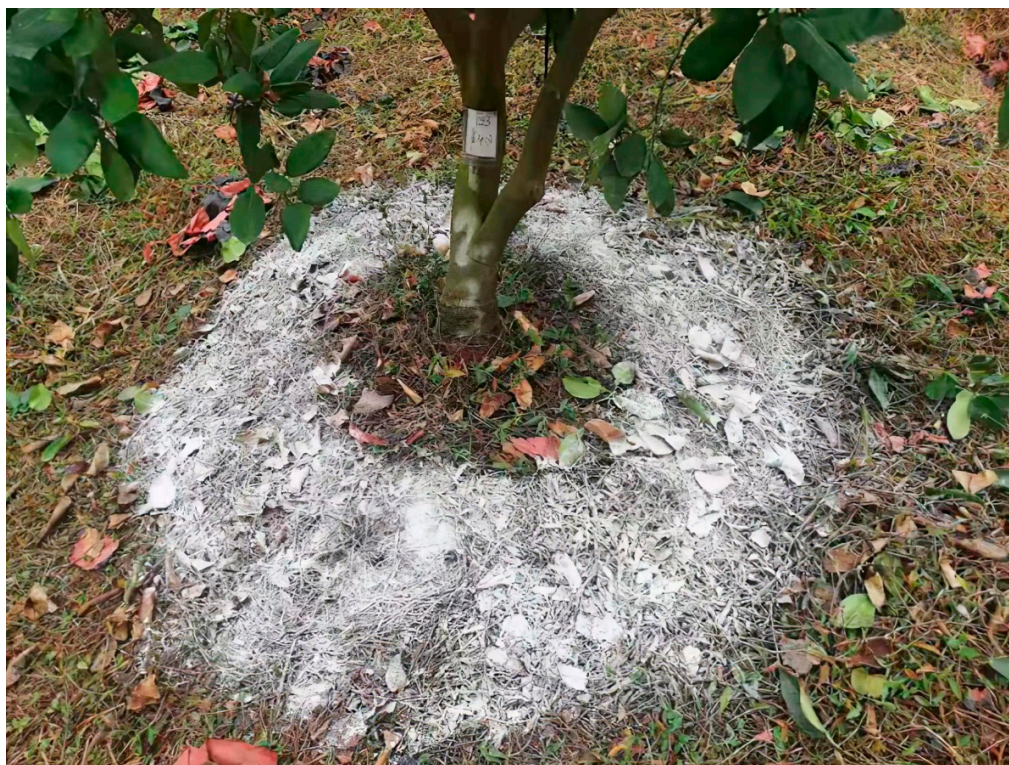

**Figure S1.** Application of lime around the tree trunk at 20-80 cm

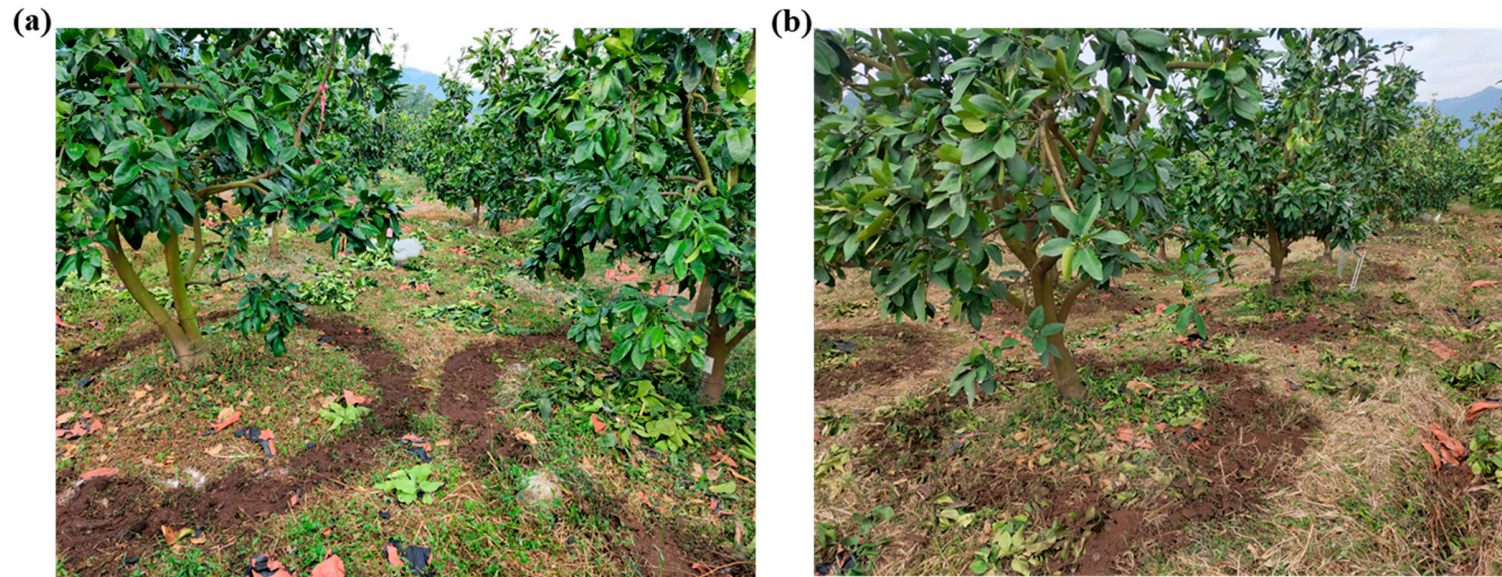

**Figure S2.** Application of mushroom residue; (a) at 75-125 cm around the tree trunk in FFP; (b) at 20-80 cm around the tree trunk in O+L+M treatment.
